# Supplementary material for: Dual-functioning porous catalysts: robust electro-oxidation of small organic molecules and water electrolysis using bimetallic Ni/Cu foams
Source: Royal Society of Chemistry journal article supplement (doi:10.1039/d0se01835j), 2020-12-26
Supplement: d0se01835j1.pdf [file d0se01835j1.pdf]

## Dual functioning porous catalysts: Robust electro-oxidation of small organic molecules and water electrolysis at bimetallic Ni/Cu foam

Mohamed R. Rizk, Muhammad G. Abd El-Moghny\*, Amina Mazhar, Mohamed. S. El-Deab\*, and B.E. El-Anadouli\*

Chemistry Department, Faculty of Science, Cairo University, Cairo, Egypt

\*corresponding authors

E-mail addresses: [gmoahmd@sci.cu.edu.eg](mailto:gmoahmd@sci.cu.edu.eg) (Muhammad G. Abd El-Moghny), [msaada68@yahoo.com](mailto:msaada68@yahoo.com) (M S. El-Deab), and [Baghat@sci.cu.edu.eg](mailto:Baghat@sci.cu.edu.eg) (B.E. El-Anadouli)

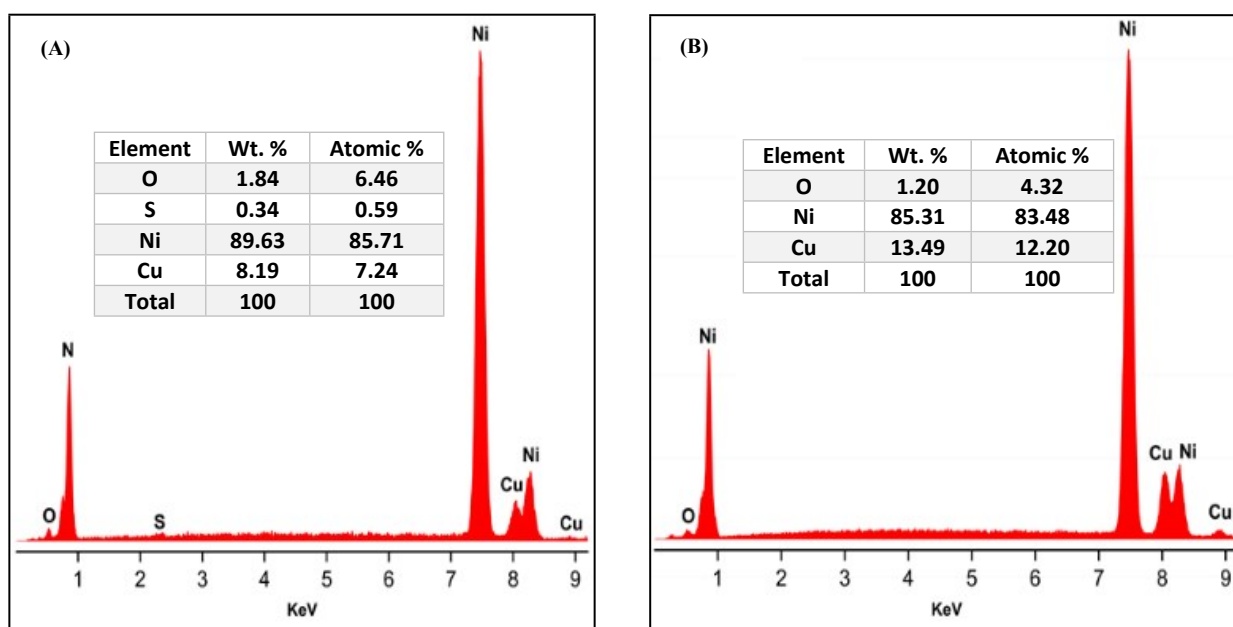

Figure S1: The EDS analyses of (A) Ni foam, and (B) Ni/Cu foam.

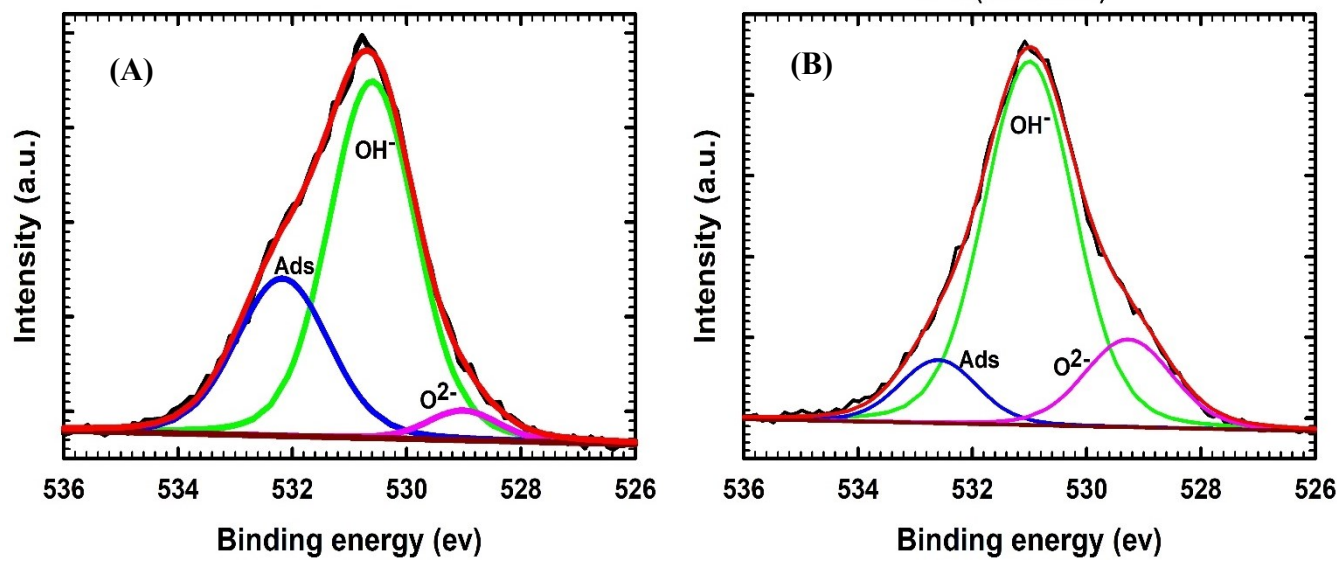

Figure S2: XPS spectra of O1s for the Ni foam (A) and the Ni/Cu foam (B), respectively.

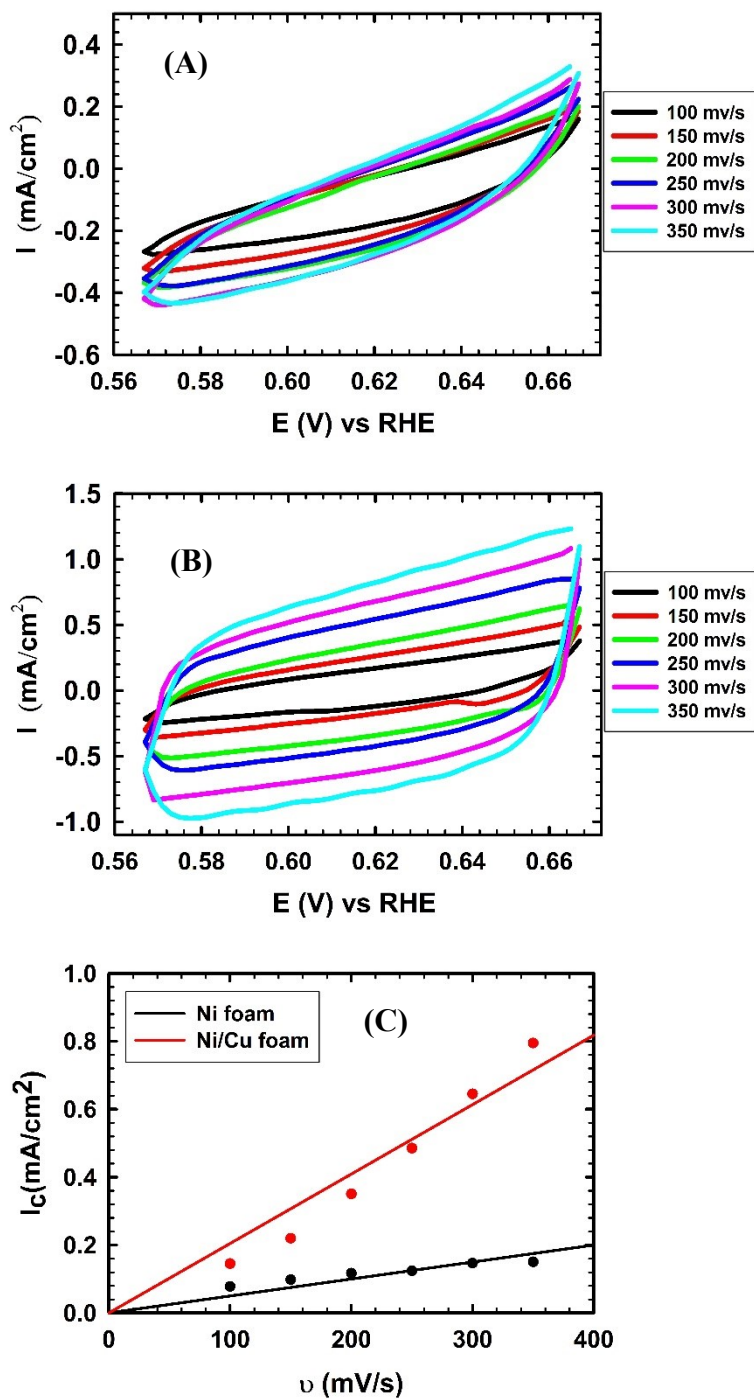

Figure S3: CVs of: (A) Ni foam, and (B) Ni/Cu foam measured in 1 M KOH solution at various potential scan rates from 100 to 350 mV s<sup>-1</sup>. (C) The relation between the capacitive current densities ( $I_c$ ) recorded at 0.62 V and scan rates ( $\nu$ ) for the Ni foam (black line), and the Ni/ Cu foam (red line).

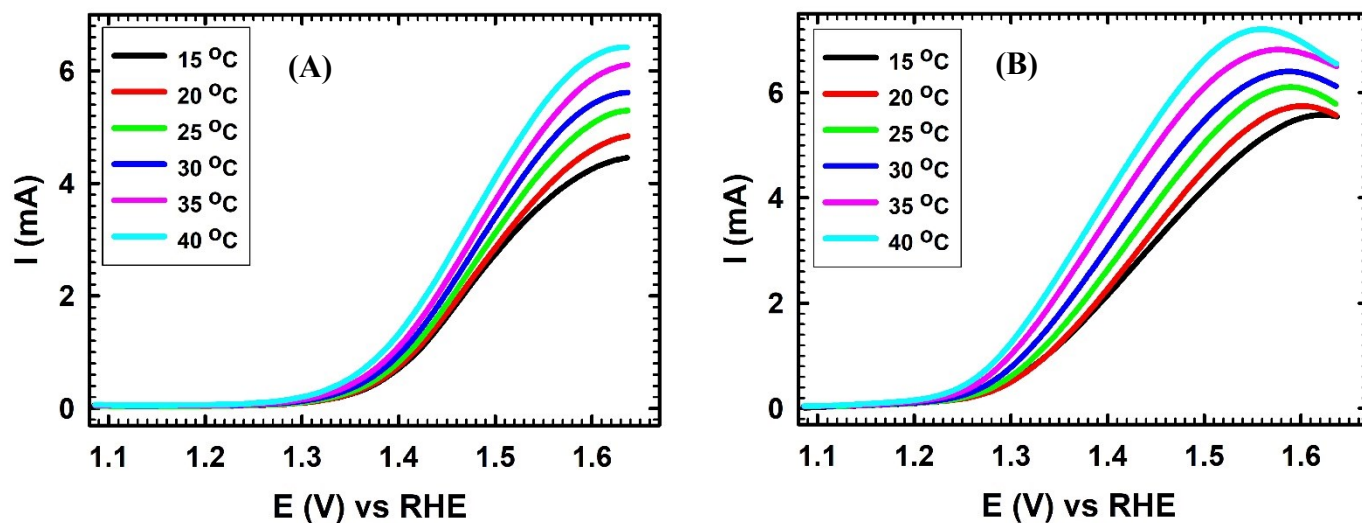

Figure S4: : LSVs recorded at different temperatures for GOR at Ni foam (A), and Ni/Cu foam (B) carried out in 0.3 M KOH solution containing 0.1 M glycerol.

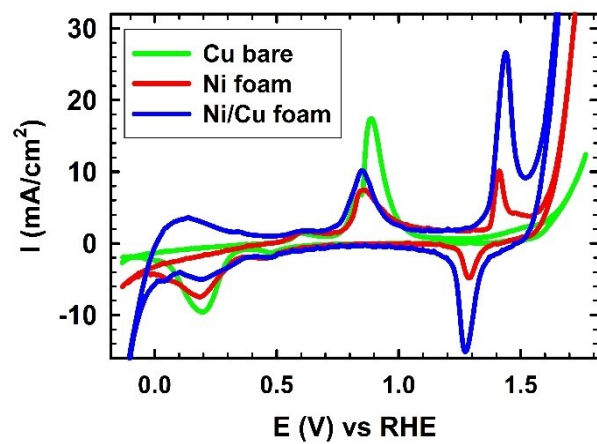

Figure S5: CVs for the Cu bare electrode (green line), Ni foam (red line), and Ni/Cu foam (blue line) carried out in 1 M KOH with potential scan rate of  $10 \text{ m V s}^{-1}$ .

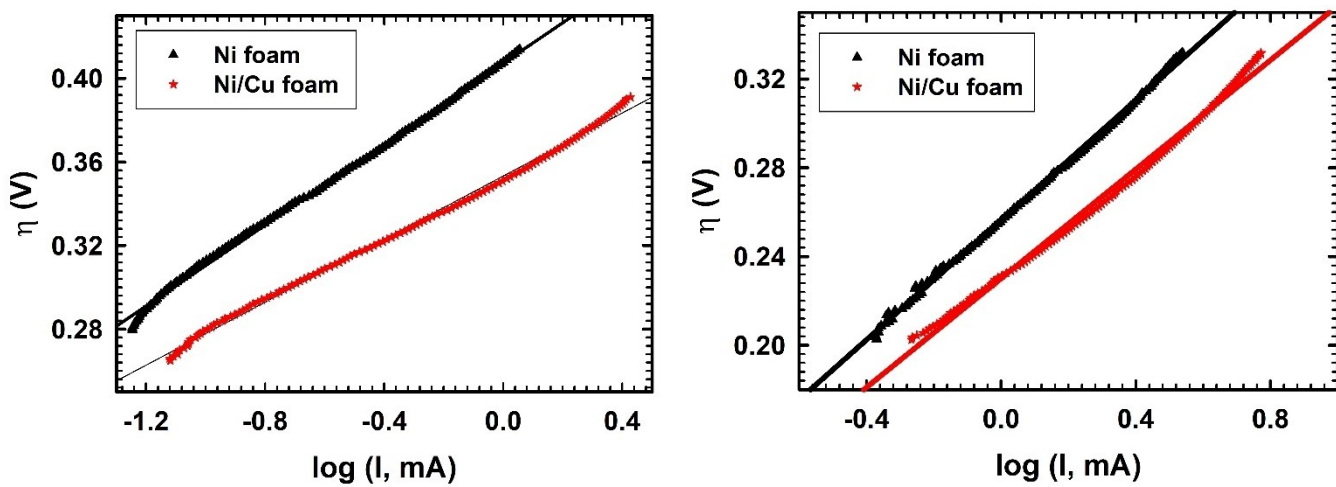

Figure S6: Tafel plots for Ni foam (black line), and Ni/Cu foam (red line) during OER (A), and HER (B) carried out in an aqueous solution of 1 M KOH at a potential scan rate of  $0.1 \text{ mV s}^{-1}$ .

(A)

(B)

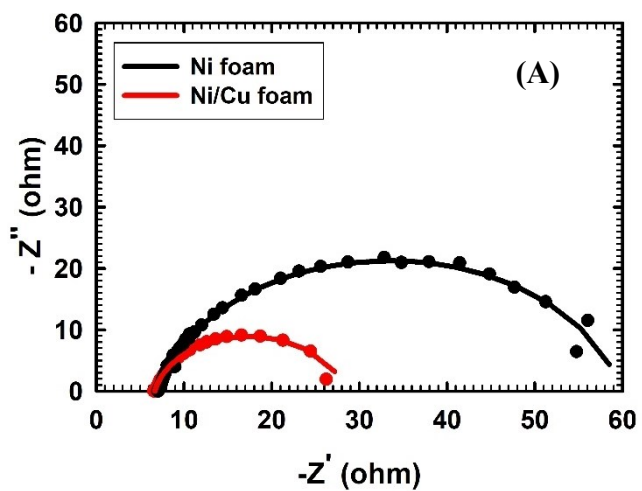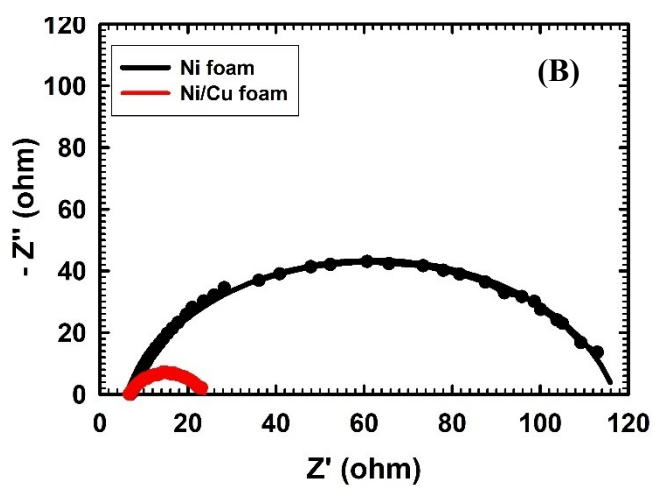

Figure S7: Nyquist plots during OER at 370 mV (A), and HER at -80 mV (B) for the Ni foam (black line) and Ni/Cu foam (red line) measured in 1 M KOH solution.

**Table S1: Comparison of the HER activity for several catalysts reported in recent years.**

| <b>Catalyst</b>                                   | <b><math>\eta</math> @ 10 mA/cm<sup>2</sup> (mV)</b> | <b>Reference</b> |
|---------------------------------------------------|------------------------------------------------------|------------------|
| <b>Ni/Cu foam</b>                                 | <b>80</b>                                            | <b>This work</b> |
| <b>U-CNT-900</b>                                  | <b>255</b>                                           | 1                |
| <b>Co-NCNT/CC<sup>a</sup></b>                     | <b>180</b>                                           | 2                |
| <b>CoOx/CN</b>                                    | <b>270</b>                                           | 3                |
| <b>NiS<sub>2</sub>/CC<sup>a</sup></b>             | <b>149</b>                                           | 4                |
| <b>Ni<sub>3</sub>S<sub>2</sub>/NF<sup>a</sup></b> | <b>123</b>                                           |                  |
| <b>MoC<sub>x</sub> nano-octahedrons</b>           | <b>150</b>                                           | 5                |



|                                                |            |    |
|------------------------------------------------|------------|----|
| <b>Ni<sub>2</sub>P nanoparticles</b>           | <b>230</b> | 6  |
| <b>WP<sub>2</sub> submicroparticles</b>        | <b>153</b> | 7  |
| <b>CoP/CC<sup>a</sup></b>                      | <b>209</b> | 8  |
| <b>WP NA/CC<sup>a</sup></b>                    | <b>150</b> | 9  |
| <b>NiMoO<sub>4</sub>-Ni(OH)<sub>2</sub>/NF</b> | <b>93</b>  | 10 |
| <b>NiFe LDH-NS@DG10</b>                        | <b>300</b> | 11 |
| <b>Ni(OH)<sub>2</sub>@Ni/CC</b>                | <b>68</b>  | 12 |
| <b>NiSe–Ni<sub>0.85</sub>Se/CP</b>             | <b>101</b> | 13 |
| <b>FNHNs/NF</b>                                | <b>140</b> | 14 |
| <b>Fe–Ni<sub>3</sub>C-2%</b>                   | <b>178</b> | 14 |
| <b>NiMoN-550</b>                               | <b>89</b>  | 15 |
| <b>CoNi-OOH-30(40)</b>                         | <b>210</b> | 16 |
| <b>NiFeCo LDH/NF</b>                           | <b>108</b> | 17 |

**Table S2: Comparison of the UOR activity for several recently reported catalysts.**

| <b>Catalyst</b>                                | <b>Potential @ 10 mA/cm<sup>2</sup> (V vs· RHE)</b> | <b>Reference</b> |
|------------------------------------------------|-----------------------------------------------------|------------------|
| <b>Ni/Cu foam</b>                              | <b>1.38</b>                                         | <b>This work</b> |
| <b>NF/NiMoO-Ar</b>                             | <b>1.37</b>                                         | 18               |
| <b>Ni<sub>3</sub>N NA/CC</b>                   | <b>1.35</b>                                         | 19               |
| <b>Ni<sub>2</sub>P/NF</b>                      | <b>1.37</b>                                         | 20               |
| <b>Ni(OH)<sub>2</sub> nanotube-NF</b>          | <b>1.41</b>                                         | 21               |
| <b>NiO nanosheet array</b>                     | <b>1.38</b>                                         | 22               |
| <b>NiMoO<sub>4</sub>-Ni(OH)<sub>2</sub>/NF</b> | <b>1.34</b>                                         | 10               |

|                                                              |             |    |
|--------------------------------------------------------------|-------------|----|
| <b>ERGO-Ni</b>                                               | <b>1.45</b> | 23 |
| <b>NiCo alloy</b>                                            | <b>1.53</b> | 24 |
| <b>NiMo sheet array</b>                                      | <b>1.37</b> | 25 |
| <b>L-MnO<sub>2</sub></b>                                     | <b>1.37</b> | 26 |
| <b>Ni(OH)<sub>2</sub> nanocube</b>                           | <b>1.55</b> | 27 |
| <b>NiFeCo LDH/NF</b>                                         | <b>1.35</b> | 17 |
| <b>Ni(OH)<sub>2</sub> nanosheets</b>                         | <b>1.52</b> | 28 |
| <b>Fe<sub>11.1%</sub>Ni<sub>3</sub>S<sub>2</sub>/Ni Foam</b> | <b>1.40</b> | 29 |

## References

- 1 S. Gao, G.-D. Li, Y. Liu, H. Chen, L.-L. Feng, Y. Wang, M. Yang, D. Wang, S. Wang and X. Zou, *Nanoscale*, 2015, **7**, 2306–2316.
- 2 Z. Xing, Q. Liu, W. Xing, A. M. Asiri and X. Sun, *ChemSusChem*, 2015, **8**, 1850–1855.
- 3 H. Jin, J. Wang, D. Su, Z. Wei, Z. Pang and Y. Wang, *J. Am. Chem. Soc.*, 2015, **137**, 2688–2694.
- 4 C. Tang, Z. Pu, Q. Liu, A. M. Asiri and X. Sun, *Electrochim. Acta*, 2015, **153**, 508–514.
- 5 H. Bin Wu, B. Y. Xia, L. Yu, X.-Y. Yu and X. W. D. Lou, *Nat. Commun.*, 2015, **6**, 1–8.
- 6 L. Feng, H. Vrubel, M. Bensimon and X. Hu, *Phys. Chem. Chem. Phys.*, 2014, **16**, 5917–5921.
- 7 Z. Xing, Q. Liu, A. M. Asiri and X. Sun, *Acs Catal.*, 2015, **5**, 145–149.
- 8 J. Tian, Q. Liu, A. M. Asiri and X. Sun, *J. Am. Chem. Soc.*, 2014, **136**, 7587–7590.
- 9 Z. Pu, Q. Liu, A. M. Asiri and X. Sun, *ACS Appl. Mater. Interfaces*, 2014, **6**, 21874–21879.
- 10 S. Hu, H. Wu, C. Feng and Y. Ding, *Int. J. Hydrogen Energy*, 2020, **45**, 21040–21050.
- 11 Y. Jia, L. Zhang, G. Gao, H. Chen, B. Wang, J. Zhou, M. T. Soo, M. Hong, X. Yan and G. Qian, *Adv. Mater.*, 2017, **29**, 1700017.
- 12 Z. Xing, L. Gan, J. Wang and X. Yang, *J. Mater. Chem. A*, 2017, **5**, 7744–7748.
- 13 Y. Chen, Z. Ren, H. Fu, X. Zhang, G. Tian and H. Fu, *Small*, 2018, **14**, 1800763.
- 14 J. Liu, Y. Yang, B. Ni, H. Li and X. Wang, *Small*, 2017, **13**, 1602637.
- 15 Z. Yin, Y. Sun, C. Zhu, C. Li, X. Zhang and Y. Chen, *J. Mater. Chem. A*, 2017, **5**, 13648–13658.
- 16 C. Yu, J. Lu, L. Luo, F. Xu, P. K. Shen, P. Tsiakaras and S. Yin, *Electrochim. Acta*, 2019, **301**, 449–457.
- 17 P. Babar, A. C. Lokhande, V. Karade, B. Pawar, M. G. Gang, S. Pawar and J. H. Kim, *ACS Sustain. Chem. Eng.*
- 18 Z.-Y. Yu, C.-C. Lang, M.-R. Gao, Y. Chen, Q.-Q. Fu, Y. Duan and S.-H. Yu, *Energy Environ. Sci.*, 2018, **11**, 1890–1897.
- 19 Q. Liu, L. Xie, F. Qu, Z. Liu, G. Du, A. M. Asiri and X. Sun, *Inorg. Chem. Front.*, 2017, **4**, 1120–1124.
- 20 D. Liu, T. Liu, L. Zhang, F. Qu, G. Du, A. M. Asiri and X. Sun, *J. Mater. Chem. A*, 2017, **5**, 3208–3213.
- 21 R.-Y. Ji, D.-S. Chan, J.-J. Jow and M.-S. Wu, *Electrochem. commun.*, 2013, **29**, 21–24.
- 22 M.-S. Wu, G.-W. Lin and R.-S. Yang, *J. Power Sources*, 2014, **272**, 711–718.
- 23 D. Wang, W. Yan, S. H. Vijapur and G. G. Botte, *Electrochim. Acta*, 2013, **89**, 732–736.
- 24 W. Xu, H. Zhang, G. Li and Z. Wu, *Sci. Rep.*, 2014, **4**, 5863.
- 25 Y. Liang, Q. Liu, A. M. Asiri and X. Sun, *Electrochim. Acta*, 2015, **153**, 456–460.
- 26 S. Chen, J. Duan, A. Vasileff and S. Z. Qiao, *Angew. Chemie Int. Ed.*, 2016, **55**, 3804–3808.

- 27 M.-S. Wu, R.-Y. Ji and Y.-R. Zheng, *Electrochim. Acta*, 2014, **144**, 194–199.
- 28 X. Zhu, X. Dou, J. Dai, X. An, Y. Guo, L. Zhang, S. Tao, J. Zhao, W. Chu and X. C. Zeng, *Angew. Chemie Int. Ed.*, 2016, **55**, 12465–12469.
- 29 W. Zhu, Z. Yue, W. Zhang, N. Hu, Z. Luo, M. Ren, Z. Xu, Z. Wei, Y. Suo and J. Wang, *J. Mater. Chem. A*, 2018, **6**, 4346–4353.
